1 **Title: Policies or Knowledge: Priors differ between perceptual and sensorimotor**  
2 **tasks**

3

4 **Abbreviated title: Perceptual and sensorimotor priors are different**

5

6 Claire Chambers

7 Hugo Fernandes

8 Konrad Paul Kording

9

10 Department of Bioengineering and Department of Neuroscience, University of

11 Pennsylvania, Philadelphia, 19104, USA

12

13 **Corresponding author:** Claire Chambers, [clairenc@seas.upenn.edu](mailto:clairenc@seas.upenn.edu)

14

15 **Contributions**

16 HF and KPK designed experiments. CC and HF collected data. CC analyzed the data,

17 with contributions from HF. CC and KPK wrote the manuscript, with contributions

18 from HF. KPK initiated the research.

19

20

21

22

23

24

25

26

27

28

29

30

31

32

33

34

35 ABSTRACT

36 If the brain abstractly represents probability distributions as knowledge, then  
37 the modality of a decision, e.g. movement vs perception, should not matter. If on the  
38 other hand, learned representations are policies, they may be specific to the task  
39 where learning takes place. Here, we test this by asking if a learned spatial prior  
40 generalizes from a sensorimotor estimation task to a two-alternative-forced choice (2-  
41 Afc) perceptual comparison task. A model and simulation-based analysis revealed  
42 that while participants learn the experimentally-imposed prior distribution in the  
43 sensorimotor estimation task, measured priors are consistently broader than expected  
44 in the 2-Afc task. That the prior does not fully generalize suggests that sensorimotor  
45 priors strongly resemble policies. In disagreement with standard Bayesian thought,  
46 the modality of the decision has a strong influence on the implied prior distribution.

47

48 NEW AND NOTEWORTHY

49 We do not know if the brain represents abstract and generalizable knowledge  
50 or task-specific policies that map internal states to actions. We find that learning in a  
51 sensorimotor task does not generalize strongly to a perceptual task, suggesting that  
52 humans learned policies and did not truly acquire knowledge. Priors differ across  
53 tasks, thus casting doubt on the central tenet of many Bayesian models, that the brain's  
54 representation of the world is built on generalizable knowledge.

55

56 KEYWORDS

57 Generalization, Bayesian, Sensorimotor, Knowledge, Policies.

58

59 INTRODUCTION

60 The acquisition of knowledge is thought to be at the core of the brain's  
61 function (Tenenbaum et al. 2006, 2011; Battaglia et al. 2013). A behavioral signature  
62 of knowledge-use is strong generalization across situations. For instance, when a child  
63 learns a new word they can use it in many new situations, not just the sentence where  
64 the word was learned (Xu and Tenenbaum 2007; Perfors et al. 2011). However, the  
65 framing of learned representations as generalizable knowledge may not apply to all of  
66 the brain's functions equally. For example, generalization from movements of one  
67 arm to those of the other is not always complete (Criscimagna-hemminger et al. 2003;  
68 Shadmehr 2004). Indeed, the reinforcement learning literature (Sutton and Barto

69 1998) defines an alternative way of learning. Within this framework, learning is  
70 framed as policy-acquisition, i.e. mappings from states to actions (Daw and Doya  
71 2006; Haith and Krakauer 2013). This definition implies that learning of policies is  
72 specific to the action for which it was learned and thus suggests limited generalization  
73 across tasks. We want to know if humans are policy animals, knowledge carriers, or  
74 something in between.

75 In sensorimotor estimation tasks, humans weigh prior knowledge with sensory  
76 information in a near-optimal way (Körding and Wolpert 2004; Tassinari et al. 2006;  
77 Berniker et al. 2010; Vilares et al. 2012) and generalize learned prior statistics to new  
78 conditions (Fernandes et al. 2014). Thus, there is evidence for learning of  
79 sensorimotor priors. However, little is known about whether sensorimotor learning  
80 generalizes when the read-out modality of the decision changes. Therefore, we do not  
81 know if sensorimotor priors should be described as knowledge or policies. This is  
82 important because it has consequences for how neural representations should be  
83 conceptualized.

84 Here, we investigate if priors are the same across modalities by examining  
85 whether priors generalize across two simple tasks. The experiment was designed so  
86 that tasks were equivalent in terms of how probabilistic information should be  
87 combined to achieve optimal performance. Participants learned a spatial prior in a  
88 sensorimotor estimation task, and we asked if they transferred the learned prior to a  
89 two-alternative-forced-choice (2-Afc) task, where participants made a binary decision  
90 about object location. We inferred the standard deviation of the learned prior and  
91 found that the learned sensorimotor prior does not generalize fully to the 2-Afc task.  
92 The prior standard deviation measured from 2-Afc decisions was higher than the  
93 standard deviation measured from sensorimotor estimates. This shows that a learned  
94 prior does not generalize fully across sensorimotor and decisional modalities and  
95 suggests that sensorimotor priors are represented as policies.

96

## 97 METHODS

98 The results presented here use data from previous work (Acuna et al. 2015),  
99 augmented with newly collected data on the same paradigm. A complete description  
100 of the methods is given in previous work and will be described here. Participants were  
101 six males and two females (age:  $M = 29.87$ ,  $SD = 7.27$ ). Participants gave written

102 informed consent before taking part. Ethical approval was provided by the NU IRB  
103 #20142500001072 (Northwestern University, USA).

104 We required tasks that were equivalent in how probabilistic information  
105 should be combined across sources and that allowed us to infer priors used by  
106 participants. We used a “coin-catching” task (Berniker et al. 2010; Vilares et al. 2012;  
107 Acuna et al. 2015), where on each trial, participants guessed the location of a hidden  
108 stimulus (“coin”) on the screen based on an uncertain visual cue (“splash”) and a prior  
109 learned through feedback on stimulus location. Varying the prior and likelihood width  
110 allowed us to assess whether participants weighed prior and likelihood information  
111 according to their relative uncertainties during sensorimotor estimation and decision  
112 making.

113 Before starting the experiment, participants were presented with the  
114 instructions that on each trial, someone was throwing two coins, one after another,  
115 into a pond represented by the screen; and that their aim was to guess where the coin  
116 stimuli landed. They were told that there was no relationship between where the two  
117 coins landed (Fig. 1). On each trial, they were presented with “splash” stimuli and  
118 were told that it was caused by a hidden coin stimulus. On estimation trials,  
119 participants provided an estimate of the second stimulus’s location on the horizontal  
120 axis by placing a vertical bar where they thought that the stimulus landed. On 2-Afc  
121 trials, participants compared the locations of the inferred stimulus locations and  
122 indicated which stimulus was further to the right. Participants were paid based on  
123 their performance on the estimation task, as quantified using the distance between  
124 their estimates and the true stimulus location.

125

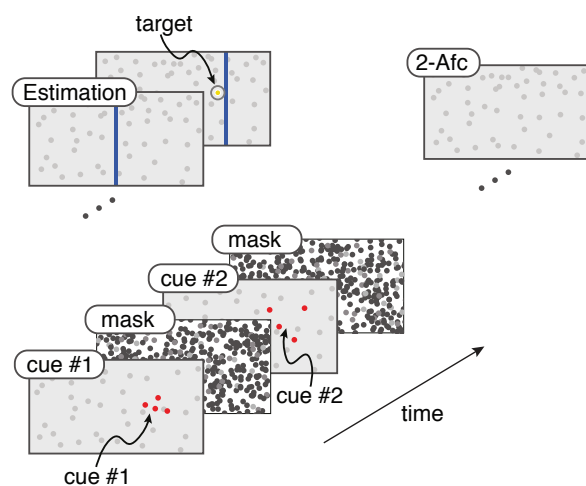

126

127 Figure 1. Experimental protocol. Participants were shown two splashes (likelihoods) in  
128 succession, created by hidden coins (stimuli) falling into a pond (screen), which were  
129 interleaved with white noise masks. Participants were then presented with one of two possible  
130 tasks. In the estimation task, participants were prompted to place a net where the second  
131 hidden stimulus fell. In the 2-Afc task, participants reported which hidden stimulus landed  
132 farther to the right.

133  
134 Eight participants performed the experiment, including the seven participants  
135 from an existing data set (Acuna et al. 2015) and one additional participant to increase  
136 the power of group statistics (statistical results were the same with and without this  
137 participant). The experiment lasted 10,000 trials over 5 days. On each day, they were  
138 seated in front of a computer monitor (52 cm wide, 32.5 cm high) in a quiet room.  
139 Stimuli were generated by sampling visual stimuli from a Gaussian prior distribution  
140 defined over spatial location, with a mean at the center of the screen and standard  
141 deviation of .04 or .2 in units of screen width. The stimulus was hidden from view.  
142 Instead, they were presented with a visual cue with experimentally-controlled  
143 uncertainty (splash stimulus). The splash consisted of four dots sampled from a  
144 Gaussian likelihood distribution centered on the stimulus location. The likelihood  
145 distribution could have a standard deviation of .025 or .1 in units of the screen. In all  
146 trials, two consecutive splashes were displayed for .025 s, each followed by a visual  
147 mask for .5 s. The standard deviation of the likelihood was either the same across  
148 presentations within a trial (both at .025 or both at .1) or varied within trial (.025 and  
149 .1) and presented in randomized order. We refer to the broader likelihood as the  
150 reference and the narrower likelihood as the probe.

151 On each trial, participants performed one of two tasks, as defined by the  
152 question displayed at the end of the trial. On estimation trials, participants were asked  
153 “Where was the coin located?” and they indicated where they thought the second coin  
154 stimulus was using a vertical bar (“net”), which was 2% screen width and extended  
155 from the top to the bottom of the screen. On 2-Afc trials, participants were asked  
156 “Which coin was further to the right?” and using a key-press they indicated if they  
157 thought the first or second coin stimulus was further to the right. Trials in both tasks  
158 were identical until the end of the trial, until the question was displayed on screen. At  
159 the end of estimation trials only, feedback was provided on the exact location of the  
160 stimulus, but not on 2-Afc trials, allowing us to ask if the prior learned in the  
161 estimation task generalizes to the 2-Afc task.

162 *Experimental Design*

163           There were four conditions in the estimation task: Narrow Prior, Narrow  
164 Likelihood; Narrow Prior, Wide Likelihood; Wide Prior, Narrow Likelihood; Wide  
165 Prior, Wide Likelihood. In the 2-Afc trials, conditions were defined by the width of  
166 the prior (Narrow Prior and Wide Prior) and whether likelihoods were equal within  
167 trial, Equal Likelihoods (both narrow or both wide) or Unequal Likelihoods (one  
168 narrow and one wide). We only used Unequal Likelihood trials in the present study.  
169 Therefore in our analysis, there were two conditions for the 2-Afc trials: Narrow Prior  
170 and Wide Prior.

171           On each day of the experiment participants performed two 1,000-trial blocks.  
172 The prior over stimulus location switched from block to block (e.g., from wide to  
173 narrow on one day, from narrow to wide on the subsequent day, and so on). Each  
174 block contained 500 estimation trials and 500 2-Afc trials in a random order all  
175 generated from the same prior. In order to aid with learning the prior, estimation trials  
176 made up the first half of each block (375 estimation trials and 125 2-Afc trials), and 2-  
177 Afc trials made up the second half of each block (125 estimation trials and 375 2-Afc  
178 trials).

#### 179           *Data Analysis and simulations*

180           We asked whether the use of prior information differed between  
181 psychophysical tasks. To answer this question, we examined whether the prior  
182 parameters fit to one of the two tasks could predict behavior well in the other task. As  
183 a baseline comparison, we examined whether the prior standard deviation fit to one  
184 half of the data predicted behavior on the other half of the data, within task. To  
185 examine how each participant's prior related to the veridical prior used in the  
186 experiment, we estimated the prior parameters from each task. To ensure that the data  
187 analysis produced unbiased results, we performed the same analysis on data simulated  
188 from an ideal Bayesian model.

#### 189           *Quantifying the Estimation slope and PSE slope from behavioral data*

190           In order to examine the use of probabilistic information during the estimation  
191 task, we examined how much participants relied on likelihood or prior information. In  
192 the estimation task, participants gave a continuous estimate of stimulus location. We  
193 wanted to quantify how much participants relied on the learned stimulus location  
194 (prior) or visual information (likelihood). To do so, we computed the relationship  
195 between the likelihood's center and participants' estimates, which we termed the  
196 *Estimation slope*. If someone were to rely only on likelihood information to judge

197 stimulus location, on average, estimates should correspond to the center of the  
198 likelihood (*Estimation slope* =1). If someone were to ignore the likelihood entirely  
199 and rely only on their prior to judge stimulus location, there should be no relationship  
200 between the likelihood's center and estimates (*Estimation slope* = 0). The Bayesian  
201 optimal strategy is to weigh the prior and likelihood according to their relative  
202 precision, as in Equation 1.

$$203 \quad \textit{Estimation slope} = \sigma_s^2 / (\sigma_s^2 + \sigma_l^2 / n) \quad (1)$$

204 In the 2-Afc task, participants were given probabilistic information on  
205 stimulus location exactly as in the estimation task. On each trial, they compared the  
206 locations of two stimuli with different uncertainties, a probe stimulus with Narrow  
207 Likelihood and a reference stimulus with Wide Likelihood. Uncertainty should  
208 influence the judgment of stimulus location in the same way as in the estimation task.  
209 A Bayesian observer judges the more uncertain stimulus to be shifted further to the  
210 prior mean than the more certain stimulus. This, in turn, influences decisions about  
211 relative stimulus location. Therefore, use of the prior can be inferred from  
212 participants' 2-Afc data.

213 Consider the psychometric function that describes the comparison of stimuli  
214 with unequal widths. The psychometric function is the probability that the probe  
215 stimulus is reported to the right,  $P(\textit{Decision}=1)$ , as a function of difference between  
216 the likelihood stimuli (*Discrepancy*), and the *Reference location*. The participant's  
217 prior influences the *Discrepancy* at which the stimuli are perceived as equal (point of  
218 subjective equality, *PSE*). For a Bayesian observer, the *PSE* arises when the reference  
219 is more distant from the prior's center than the probe. The *PSE* further deviates from  
220 zero as the distance between the prior and the reference increases. Importantly, the  
221 slope of this linear relationship, the *PSE slope*, is related to the width of the  
222 participant's prior – a *PSE slope* of 0 shows that participants relied only on visual  
223 information from the likelihood; and the more negative the *PSE slope*, the narrower  
224 the participant's prior. The optimal *PSE slope* is given by Equation 2.

$$225 \quad \textit{PSE slope} = (\sigma_{l1}^2 / n - \sigma_{l2}^2 / n) / (\sigma_{l2}^2 / n + \sigma_s^2) \quad (2)$$

226 We fit psychometric functions (the cumulative Gaussian function) to each  
227 participant's decision data. The *PSE slope* ( $m_{PSE}$ ) estimated from this function  
228 provides an indicator of the variance of the participant's prior. We model the  
229 probability of a decision as:



230 
$$P(\text{Decision} = 1) = \left( \frac{1}{2} \left[ 1 + \operatorname{erf} \left( \frac{\delta - s_{l2} \times m_{PSE}}{\sqrt{2} \sigma} \right) \right] \right) \quad (3)$$

231 where  $\delta$  is the discrepancy between stimuli,  $s_{l2}$  is the location of the reference  
232 stimulus with broader likelihood,  $\sigma$  describes the deviation of the function (Acuna et  
233 al. 2015). We find the values of  $m_{PSE}$  and  $\sigma$  using a maximum-likelihood estimation  
234 algorithm.

235 *Analysis of priors during Estimation and 2-Afc decision making*

236 If priors are the same, then priors used in one task should predict behavior in  
237 the other task well. A cross-validation error computed across tasks should not exceed  
238 the error computed within tasks. To test this, we performed 2-fold cross-validation by  
239 estimating priors from one task and computing the Mean Squared Error (MSE) on the  
240 held-out task (Across-task MSE). We compared the Across-task MSE with the  
241 within-task MSE, computed by performing 2-fold cross-validation using the data of  
242 one task, then summing the MSE across tasks. If priors are the same, we expect that  
243 the Across-task MSE should not exceed the Within-task MSE. This analysis allowed  
244 us to examine if priors were the same or different across tasks.

245 To quantify the prior width in the estimation task and the 2-Afc task, we used  
246 the *Estimation slope* and the *PSE slope* respectively. Using a maximum-likelihood  
247 estimation algorithm, we estimated prior standard deviation parameters from the  
248 slopes of one task by minimizing the MSE between the slope values and the slopes  
249 given by Equations 1 and 2. To compute the Across-task MSE, we predicted the  
250 slopes of the held-out task from the fitted parameters and compared the predicted  
251 slope with that computed from the data using the MSE. To compute the Within-task  
252 MSE, we estimated the prior standard deviation parameters from 50% data of one  
253 task, then predicted the slope for the same task, and compared the predicted slope to  
254 the slope computed from the held-out data.

255 To ensure that our analysis led to unbiased results, we simulated 1000  
256 Bayesian observers who combined prior and likelihood information optimally and  
257 used the veridical prior parameters in both tasks. Simulated observers should not  
258 show systematic differences between the Across-task and Within-task MSE.

259 In order to examine how the priors used by participants differed from the  
260 veridical priors, we estimated the prior standard deviation using Equations 1 and 2  
261 and a maximum likelihood estimation algorithm. We ensured that this procedure did  
262 not lead to biased results using simulations. We simulated Bayesian observers who



263 combined prior and likelihood information optimally. Simulated participants used the  
264 veridical prior standard deviation in the estimation task and used a prior standard  
265 deviation in the 2-Afc task which related to the veridical value by a factor of .5, 1, or  
266 2. We performed 1000 simulations per condition. Inferring the prior width from the  
267 behavioral data allowed us to examine generalization of the prior.

268

## 269 RESULTS

270 We asked if a learned prior distribution generalizes across tasks and thus  
271 consists of knowledge. To do so, we first had participants learn a prior in a  
272 sensorimotor estimation task where participants gave a continuous estimate of  
273 stimulus location under uncertainty. We then quantified use of the prior in a 2-Afc  
274 task where instead participants compared the locations of two hidden stimuli (Fig. 1).  
275 We used data from previous work (Acuna et al. 2015). We examined whether the data  
276 was consistent with use of the same or different priors across tasks and estimated the  
277 prior standard deviation parameters from the data of each task.

278 In our tasks, participants judged the location of visual stimuli on screen.  
279 Stimuli were samples from a Gaussian prior distribution,  $N(\mu, \sigma_s^2)$ , which were  
280 hidden from view. Instead, participants were shown an uncertain visual cue in the  
281 form of  $n$  samples ( $n=4$ ) from a Gaussian likelihood distribution, distributed around  
282 stimulus location,  $N(s, \sigma_l^2)$ . When judging stimulus location, the Bayesian optimal  
283 strategy is to combine the likelihood and the learned prior according to their relative  
284 precision. Therefore, to examine participants' use of probabilistic information, we  
285 manipulated the standard deviations of the prior and likelihood,  $\sigma_s^2$  and  $\sigma_l^2$  and  
286 quantified how much participants rely on the likelihood or prior to reach a decision  
287 (see Methods, Fig. 2). Our paradigm allowed us to examine integration of  
288 probabilistic information and to infer participants' learned priors in the estimation and  
289 2-Afc tasks.

290

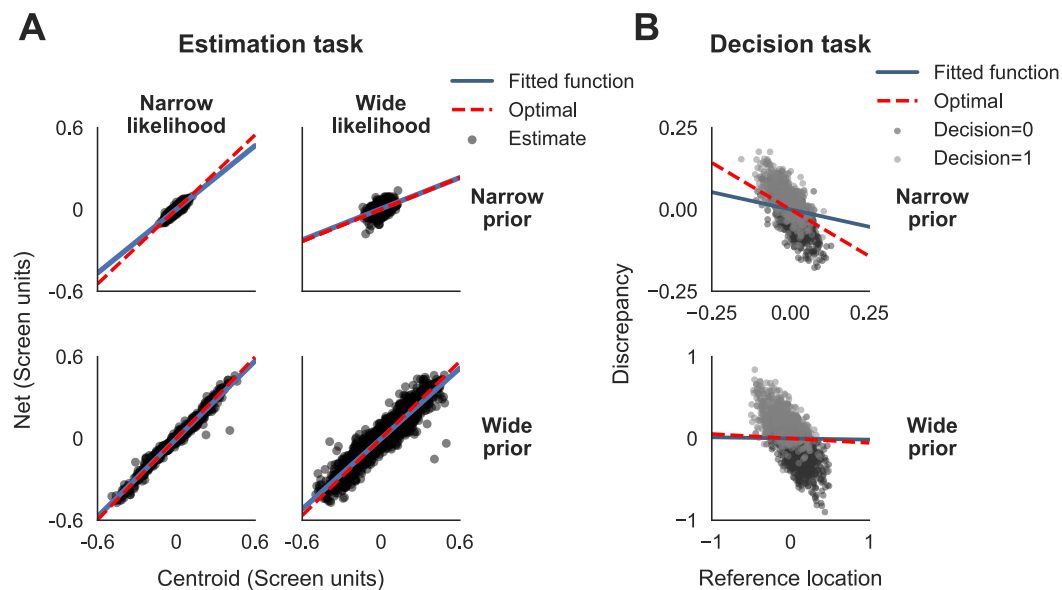

291  
292  
293  
294  
295  
296  
297  
298  
299  
300  
301

Figure 2. Estimation and 2-Afc data. (A) Estimation data overlaid with linear fit for a representative participant. The net position as a function of the centroid of the likelihood is shown for each trial (black points). Each panel displays estimation data for one condition, with overlaid fitted (blue line) and optimal (red line) functions. An *Estimation slope* of 1 indicates complete reliance on the likelihood and an *Estimation slope* of 0 indicates complete reliance on the prior. (B) 2-Afc data for the representative participant in (A) with one panel per condition. Raw binary decision data (dark gray points, Decision=0, probe stimulus to the left; light gray points, Decision=1, probe stimulus to the right). The best fitting PSE (blue line) and optimal PSE (red line) are shown. The more negative the *PSE slope*, the narrower the prior.

302 To examine use of probabilistic information in producing estimates, we first  
303 examined influence of the prior width and likelihood width on participants' reliance  
304 on the likelihood or prior (*Estimation slope*, see Fig. 2 and Methods for details). We  
305 found that both prior width and likelihood width influence the *Estimation slope*  
306 (Repeated-measures ANOVA: main effect of prior width:  $p < .0001$ ,  $F(1, 7) = 320.74$ ;  
307 main effect of likelihood width,  $p < .0001$ ,  $F(1, 7) = 140.67$ ). Therefore, participants  
308 use the prior and likelihood widths to judge stimulus location. Therefore, it makes  
309 sense to describe participants' sensorimotor estimates as Bayesian and to quantify the  
310 prior used during the task.

311 We then examined use of probabilistic information in the 2-Afc task, with a  
312 measure of reliance on prior or likelihood in decision data, which we termed the *PSE*  
313 *slope* (see Fig. 2 and Methods for details). It was important to establish that  
314 participants could incorporate a prior into 2-Afc decisions, as shown by a negative  
315 *PSE slope*. We thus compared PSE slopes with 0 (Narrow prior:  $p < .05$ , one-sample,  
316 2-sided t-test,  $t(7) = 3.60$ , Wide prior:  $p < .05$ , one-sample, 2-sided t-test,  $t(7) = 3.28$ ,  
317 Bonferroni-corrected p-values). As is shown by the significantly negative PSE slope

318 in both conditions, participants incorporate priors into 2-Afc decisions. There was a  
319 significant effect of prior width on *PSE slope* ( $p < .0001$ , paired, 2-sided t-test,  $t(14) =$   
320  $7.59$ ). Thus, participants are influenced by the prior in their decisions and have a  
321 greater reliance on the prior in the Narrow-Prior condition. This is consistent with  
322 Bayesian computation, making it appropriate to quantify the prior used during the  
323 task.

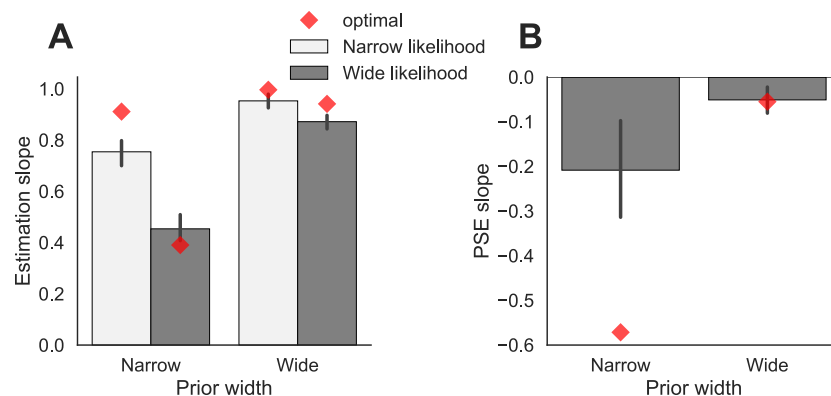

324  
325 Figure 3. *Estimation slope* and *PSE slope*. (A) The median *Estimation slope* is shown as a  
326 function of Prior width and Likelihood width. Error bars display bootstrapped 95%  
327 confidence intervals (CI). The optimal slope values for each condition are shown by red  
328 diamonds. (B) The median *PSE slope* is shown as a function of Prior width. Error bars display  
329 95% CI. The optimal slope values for each condition are shown by red diamonds.  
330

331 Behavior in the two tasks is in accordance with the use of probabilistic  
332 information. This was shown by an influence of the uncertainty of the prior and  
333 likelihood on judgments in both tasks. However, it is possible that the priors used in  
334 the estimation and 2-Afc tasks are different. Such a difference would be in violation  
335 of standard Bayesian thought where the prior representation is considered as  
336 knowledge and hence, domain general and fully available for use across tasks.

337 We then asked if the data supports task-dependent prior representations. If  
338 participants use the same prior to perform both tasks, prior width parameters  
339 estimated from one task's data should predict the other task's data well. The cross-  
340 validated error between slopes across tasks (Across-task MSE, see Methods) should  
341 not exceed the cross-validated error within tasks (Within-task MSE). We found that  
342 the Across-task MSE exceeded the MSE computed within each task ( $p < .01$ ,  
343  $t(7) = 3.35$ , Fig 4A). Simulations show that this analysis is unbiased and does not favor

344 this result (Fig 4A). This result suggests that participants use different priors in the  
345 different tasks.

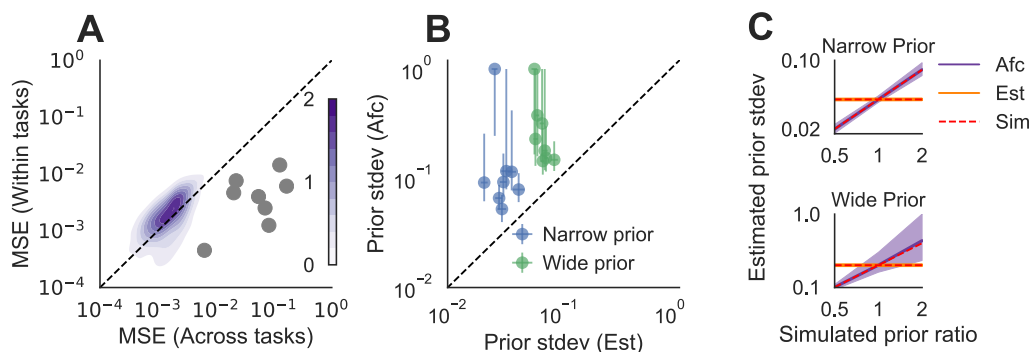

346 Figure 4. Comparison of priors in the Estimation and 2-Afc tasks (A) The MSE computed  
347 within tasks is shown as a function of the MSE computed across tasks. For each participant,  
348 the MSE across tasks exceeds the MSE within tasks. Therefore, the data is not consistent with  
349 use of the same prior. MSE for 1000 simulated participants (distribution in purple, color bar  
350 displays kernel density estimate) show that this analysis gives unbiased results. (B) For each  
351 participant, prior standard deviation inferred from the 2-Afc task data is shown as a function  
352 of the prior standard deviation inferred from the estimation task data. The median bootstrap is  
353 shown (error bar=95% CI). The dotted line shows the diagonal, for which prior width in the  
354 tasks are equal. (C) Prior parameters estimated from the data of 1000 simulated Bayesian  
355 observers in the Narrow-Prior condition (upper panel) and Wide-Prior condition (lower  
356 panel). Simulated participants use the theoretical prior in the estimation task and either the  
357 same prior standard deviation in the 2-Afc task (simulated prior ratio=1, the prior ratio being  
358 the ratio of the standard deviations in the 2-Afc and estimation tasks) or a different prior  
359 standard deviation in the 2-Afc task (simulated prior ratio= .5, or 2. The median inferred prior  
360 standard deviation is shown for the estimation task (orange) and the 2-Afc tasks (purple),  
361 shaded area= 2.5<sup>th</sup>-97.5<sup>th</sup> percentile. Broken red lines show the veridical prior standard  
362 deviations.  
363  
364

365 Having found that priors were different across tasks, we wanted to know how  
366 they were different. We, therefore, inferred the prior width (standard deviation) from  
367 the estimation and 2-Afc data from the *Estimation slope* and the *PSE slope* using  
368 bootstrapped parameter estimation. For each individual participant, the prior in the 2-  
369 Afc task is wider than the prior in the estimation task in both the Narrow and Wide  
370 prior conditions (95% CI consistently above the diagonal in Fig. 4B). We show that  
371 our estimation of prior width is unbiased and that we can successfully infer prior  
372 width from simulated estimation and 2-Afc data (Fig. 4C). Regarding our hypothesis  
373 on the generalization of the learned prior from the estimation task to the 2-Afc task,  
374 this shows that the prior does not generalize fully. Therefore, our analysis supports  
375 policy representation rather than knowledge representation.  
376

376

377 DISCUSSION

378 We examined if a prior distribution learned during a sensorimotor estimation  
379 task generalized to a computationally-equivalent 2-Afc decision task. We showed that  
380 there was a difference in priors across tasks. The finding of a wider prior in the 2-Afc  
381 task shows that the prior did not generalize fully from the situation where participants  
382 provided a continuous estimate of location to different task where participants  
383 compared two object locations. This shows that sensorimotor priors are not  
384 knowledge, in the sense that they do not generalize fully across modalities.

385 A caveat is that we assume that the brain uses maximum a-posteriori (MAP) to  
386 compute decisions. MAP is widely-used in the decision-making literature and is a  
387 plausible choice of mechanism since it maximizes reward in simple cases (Maloney  
388 2002; Mamassian et al. 2002). Other decision-making mechanisms include sampling  
389 from probability distributions and have been explored in previous work (Vul et al.  
390 2014; Acuna et al. 2015). While the choice of MAP may be reasonable in the case of  
391 unimodal Gaussian posterior distributions as in the current study, MAP is less adapted  
392 to cases of multimodal or broadly-distributed posteriors. Further work is needed to  
393 explore the decision rules that the brain uses.

394 One implication of our finding is that priors cannot be assumed to generalize  
395 even when the difference between learning and testing conditions or tasks is subtle.  
396 For example, previous work investigating decision-making mechanisms quantifies the  
397 prior in an estimation task and measures the influence of the subjective prior in a 2-  
398 Afc task (Acuna et al. 2015). The findings of this previous work therefore rest on the  
399 assumption that the prior is the same across tasks and the conclusions of this paper  
400 and others with the same assumption should be revisited.

401 Why are the priors different? The tasks may engage distinct neural systems,  
402 with the estimation task having a stronger sensorimotor component ('Where is the  
403 object in relation to me?'), whereas the 2-Afc task is a perceptual task and concerns  
404 relationships between objects in the outside world ('Where is one object in relation to  
405 another?'). Therefore, partly independent neural representations may lead to  
406 incomplete generalization across tasks (Aglioti et al. 1995; Knill 2005). In this view,  
407 partial generalization comes from partly distinct neural systems.

408 Importantly, our finding is inconsistent with the view that the brain acquires  
409 fully generalizable knowledge, in the form of priors that can automatically be  
410 incorporated into behavior regardless of the task. While high-level conceptual  
411 representations may fit the definition of knowledge (Perfors et al. 2011; Tenenbaum

412 et al. 2011; Battaglia et al. 2013), our findings show that learning in a sensorimotor  
413 task has a strong policy component, with a prior being partly confined to the task  
414 where it was learned. In naturalistic situations, the use of policies may be functionally  
415 beneficial, allowing for learning to be optimized for the task at hand.

416 Knowledge and policies are often evoked to explain behavior (Tenenbaum et  
417 al. 2011; Haith and Krakauer 2013). However, they are seldom pitted against each  
418 other as they originate from distinct theoretical frameworks. A more common  
419 dichotomy is that of procedural and declarative knowledge, which describes  
420 knowledge of how to perform some action and knowledge of concepts, respectively,  
421 or ‘knowing how and knowing that’ (Ryle 1945; Winograd 1975; Squire  
422 2004). While these resemble the concepts of knowledge and policy, the declarative-  
423 procedural dichotomy does not have the same implications for generalization.  
424 Declarative knowledge is by definition generalizable, while procedural knowledge  
425 can generalize strongly or not, that is, can be consistent with knowledge or policy.  
426 Therefore, these dichotomies do not completely overlap with one another. A second  
427 common dichotomy is that of model-based and model-free behavior (Sutton and Barto  
428 1998; Daw and Doya 2006; Doll et al. 2012). Model-based behavior leverages a  
429 model of a situation to attain a goal, while model-free behavior involves repetition of  
430 previously successful actions. When applied to our paradigm, one could conclude that  
431 the more optimal prior use in the estimation task is based on a better model of how  
432 stimuli were generated and that deviations from this in the 2-Afc task imply weaker  
433 use of a model. Our findings, however, do not support pure model-based or model-  
434 free behavior in either task and our experiment and findings are more amenable to a  
435 probabilistic treatment and quantification of priors. Discussion of findings in light of  
436 different approaches and frameworks is helpful and will be necessary to build a more  
437 unified theory of the brain’s function.

438 These results are compatible with a learning framework, rather than a high-  
439 level Bayesian view of the brain’s computations, where one set of priors (knowledge)  
440 is used for different output behaviors. Multi-layer neural networks provide a flexible  
441 way of modeling diverse kinds of behavior based on function optimization (LeCun et  
442 al. 2015; Marblestone et al. 2016). Within a broader network, sub-networks that  
443 implement specialized learning could produce patterns of generalization or non-  
444 generalization across conditions and tasks. Importantly, a system that learns by  
445 gradient descent will approximate Bayesian behavior without explicitly implementing

446 Bayesian computations (Weisswange et al. 2011; Mandt et al. 2017), simply because  
447 it is the optimal strategy for estimation under uncertainty. Our finding thus casts  
448 doubt on the view that Bayesian computation is at the core of the neural code (Zemel  
449 et al. 1998; Ma et al. 2008).

450

451 GRANTS

452 This work was funded by grant by NIH grant 5R01NS063399-08, awarded to KPK.

453 REFERENCES

454 **Acuna DE, Berniker M, Fernandes HL, Kording KP.** Using psychophysics to ask  
455 if the brain samples or maximizes. *J Vis* 15: 7, 2015.

456 **Aglioti S, DeSouza JFX, Goodale MA.** Size-contrast illusions deceive the eye but  
457 not the hand. *Curr Biol* 5: 679–685, 1995.

458 **Battaglia PW, Hamrick JB, Tenenbaum JB.** Simulation as an engine of physical  
459 scene understanding. *Proc Natl Acad Sci U S A* 110: 18327–32, 2013.

460 **Berniker M, Voss M, Kording K.** Learning priors for bayesian computations in the  
461 nervous system. *PLoS One* 5: 1–9, 2010.

462 **Criscimagna-hemminger SE, Donchin O, Gazzaniga MS, Shadmehr R, Sarah E,**  
463 **Donchin O, Michael S.** Learned Dynamics of Reaching Movements Generalize From  
464 Dominant to Nondominant Arm. *J Neurophysiol* 89: 168–176, 2003.

465 **Daw ND, Doya K.** The computational neurobiology of learning and reward. *Curr*  
466 *Opin Neurobiol* 16: 199–204, 2006.

467 **Doll BB, Simon DA, Daw ND.** The ubiquity of model-based reinforcement learning.  
468 *Curr Opin Neurobiol* 22: 1075–1081, 2012.

469 **Fernandes HL, Stevenson IH, Vilares I, Kording KP.** The generalization of prior  
470 uncertainty during reaching. *J Neurosci* 34: 11470–84, 2014.

471 **Haith AM, Krakauer JW.** Theoretical models of motor control and motor learning.  
472 In: *Routledge handbook of motor control and motor learning*. London: Routledge,  
473 2013, p. 7–28.

474 **Knill D.** Reaching for visual cues to depth: the brain combines depth cues differently  
475 for motor control and perception. *J Vis* 5: 103–115, 2005.



- 476 **Körding KP, Wolpert DM.** Bayesian integration in sensorimotor learning. *Nature*  
477 427: 244–247, 2004.
- 478 **LeCun Y, Yoshua B, Geoffrey H.** Deep learning. *Nature* 521: 436–444, 2015.
- 479 **Ma WJ, Beck JM, Pouget A.** Spiking networks for Bayesian inference and choice.  
480 *Curr Opin Neurobiol* 18: 217–222, 2008.
- 481 **Maloney LT.** Statistical decision theory and biological vision. In: *Perception and the*  
482 *physical world*, edited by D H, R M. New York: Wiley, 2002, p. 145–189.
- 483 **Mamassian P, Landy M, Maloney LT.** Bayesian Modelling of Visual Perception.  
484 In: *Probabilistic models of the brain: Perception and neural function*, edited by Rao  
485 N, Olhausen B, Lewicki M. Cambridge, MA: MIT Press, 2002, p. 13–36.
- 486 **Mandt S, Hoffman MD, Blei DM.** Stochastic Gradient Descent as Approximate  
487 Bayesian Inference. *arXiv* : 1–30, 2017.
- 488 **Marblestone AH, Wayne G, Kording KP.** Toward an Integration of Deep Learning  
489 and Neuroscience. *Front Comput Neurosci* 10: 94, 2016.
- 490 **Perfors A, Tenenbaum JB, Regier T.** The learnability of abstract syntactic  
491 principles. *Cognition* 118: 306–338, 2011.
- 492 **Ryle G.** Knowing How and Knowing That : The Presidential Address. *Proc Aristot*  
493 *Soc* 46: 1–16, 1945.
- 494 **Shadmehr R.** Generalization as a behavioral window to the neural mechanisms of  
495 learning internal models. *Hum Mov Sci* 23: 543–568, 2004.
- 496 **Squire LR.** Memory systems of the brain: A brief history and current perspective.  
497 *Neurobiol Learn Mem* 82: 171–177, 2004.
- 498 **Sutton RS, Barto AG.** *Reinforcement learning: An introduction*. Cambridge, MA:  
499 MIT press, 1998.
- 500 **Tassinari H, Hudson TE, Landy MS.** Combining priors and noisy visual cues in a  
501 rapid pointing task. *J Neurosci* 26: 10154–63, 2006.
- 502 **Tenenbaum JB, Griffiths TL, Kemp C.** Theory-based Bayesian models of inductive  
503 learning and reasoning. *Trends Cogn Sci* 10: 309–318, 2006.
- 504 **Tenenbaum JB, Kemp C, Griffiths TL, Goodman ND.** How to grow a mind:

- 505 statistics, structure, and abstraction. *Science* 331: 1279–1285, 2011.
- 506 **Vilares I, Howard JD, Fernandes HL, Gottfried JA, Kording KP.** Differential  
507 representations of prior and likelihood uncertainty in the human brain. *Curr Biol* 22:  
508 1641–1648, 2012.
- 509 **Vul E, Goodman N, Griffiths TL, Tenenbaum JB.** One and done? Optimal  
510 decisions from very few samples. *Cogn Sci* 38: 599–637, 2014.
- 511 **Weisswange TH, Rothkopf CA, Rodemann T, Triesch J.** Bayesian Cue Integration  
512 as a Developmental Outcome of Reward Mediated Learning. 6, 2011.
- 513 **Winograd T.** Frame representations and the declarative/procedural controversy. In:  
514 *Representation and understanding: Studies in cognitive science*, edited by Bobrow J.  
515 Elsevier, p. 185–210.
- 516 **Xu F, Tenenbaum JB.** Word Learning as Bayesian Inference. *Psychol Rev* 114: 245–  
517 250, 2007.
- 518 **Zemel RS, Dayan P, Pouget A.** Probabilistic interpretation of population codes.  
519 *Neural Comput* 10: 403–430, 1998.
- 520
